# Supplementary material for: Enhanced activity and stability of Zr-promoted Pd/HZSM-5 catalyst for low-temperature methane combustionElectronic supplementary information (ESI) available: O2-TPD and XRD patterns and interpretation of results. See http://www.rsc.org/suppdata/cc/b2/b205154k/
Source: Royal Society of Chemistry journal article supplement (doi:10.1039/b205154k), 2002-08-08
Supplement: b205154k1.doc [file b205154k1.doc]

**O2-TPD patterns**.

**Results interpretation:**

The experimental procedure of O2-TPD was the same with that of CH4-TPR (See the revised text) except that high purity He is used as flushing gas. According to above O2-TPD patterns, one can see that the initial O2 evolution peak appears at ~662 C for Pd/HZSM-5, while at ~652, 689, 702, 698, 664 and 662 C, respectively, for Pd-M/HZSM-5 (M = Zr, La, Y and Al), Pd/-Al2O3 and Pd/SiO2. In addition, all catalysts still display obvious high-temperature peaks except Pd/HZSM-5 and Pd-Zr/HZSM-5. Obviously, the kind of additives on Pd/HZSM-5 affects the oxygen desorption properties of these PdO species. In combination with the activity data of catalysts listed in Table 1(See the revised text), one could come to the conclusion that the PdO species desorbing oxygen at lower temperature possess higher CH4 activities, and *vice versa*. By further examining the O2-TPD patterns, one can also find that Pd-Zr/HZSM-5 exhibits a low-temperature desorption peak with the largest area, implying that it could involve more active oxygen species than the other catalysts.
