# Supplementary material for: Enhanced activity and stability of Zr-promoted Pd/HZSM-5 catalyst for low-temperature methane combustionElectronic supplementary information (ESI) available: O2-TPD and XRD patterns and interpretation of results. See http://www.rsc.org/suppdata/cc/b2/b205154k/
Source: Royal Society of Chemistry journal article supplement (doi:10.1039/b205154k), 2002-08-08
Supplement: b205154k2.doc [file b205154k2.doc]

The XRD patterns were recorded on a Rigaku Rotaflex D/Max-C X-ray diffractometer with a monochromator ( = 1.5406 Å) at a scanning rate of 2/min within the 2 range of 5-50.

Supplementary Material (ESI) for Chemical Communications

This journal is © The Royal Society of Chemistry 2002
